## Research Article

# Prognostic value of Ki-67 in nasopharyngeal carcinoma: a meta-analysis

Yulin Li<sup>1,\*</sup>, Liang Yue<sup>1,\*</sup>, Yanqing Li<sup>1</sup>, Qinxiu Zhang<sup>2</sup> and  Xin Liang<sup>1</sup><sup>1</sup>School of Medicine and Life Sciences, Chengdu University of Traditional Chinese Medicine, Chengdu, Sichuan 611137, China; <sup>2</sup>Department of Otorhinolaryngology, Hospital of Chengdu University of Traditional Chinese Medicine, Chengdu, Sichuan 610075, China

Correspondence: Xin Liang (liangxin@cducm.edu.cn)

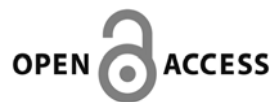

The prognostic value of Ki-67 in nasopharyngeal carcinoma (NPC) was controversial according to previous studies. We aimed to clarify the association between Ki-67 expression and survival in NPC through meta-analysis. We conducted a meta-analysis to explore the potential prognostic effect of Ki-67 on overall survival (OS), disease-free survival (DFS), distant metastasis-free survival (DMFS), and local recurrence-free survival (LRFS) in NPC. A total of 13 studies comprising 1314 NPC patients were included. High Ki-67 expression was associated with poor OS (hazard ratio [HR]= 2.70, 95% confidence interval [CI]= 1.97–3.71,  $P<0.001$ ), DFS (HR = 1.93, 95% CI = 1.49–2.50,  $P<0.001$ ), and LRFS (HR = 1.86, 95% CI = 1.11–3.12,  $P=0.019$ ). However, there was no significant association between Ki-67 and DMFS (HR = 1.37, 95% CI = 0.78–2.38,  $P=0.270$ ). Furthermore, the prognostic role of Ki-67 was maintained throughout different sample sizes, analyses of HR, and study designs for OS and DFS in various subgroups. Elevated Ki-67 expression is a reliable prognostic factor for poorer survival outcomes in NPC.

## Introduction

Nasopharyngeal carcinoma (NPC) is a rare cancer that originates from the lining of the nasopharynx [1]. The incidence of NPC is distinguished geographically; it is relatively high in Southeast Asia but low in Western countries [2]. The management of NPC chiefly depends on the disease status. For non-metastatic disease, radiotherapy is the mainstay treatment strategy [3]. For metastatic and locally recurrent disease, chemoradiotherapy and systemic therapies are the current therapeutic modalities [4]. However, over 20% of patients with NPC develop distant metastasis or recurrence after initial treatment, resulting in a poor prognosis [5]. Prognostic markers, such as tumor-node-metastasis (TNM) staging system and Epstein–Barr viral (EBV) DNA load, are widely used for prognostication and are required for the clinical management of patients with NPC. However, these parameters do not provide adequate prognostic information for individual patients. Therefore, there is an urgent need to develop valid prognostic factors for NPC.

Sustaining proliferative signaling is a hallmark of cancer cells, and tumor proliferation markers can provide a prognosis for patients [6]. Ki-67 is one of the most common proliferation markers [7] which can be detected in the cell nuclei during all phases of the cell cycle ( $G_1$ , S,  $G_2$ , and mitosis) [8]. Ki-67 has been widely investigated as a prognostic indicator in various cancers, including non-muscle invasive bladder [8], ovarian [9], gastric [10], breast [11], and non-small cell lung cancer [12]. A variety of studies reported the prognostic value of Ki-67 in patients with NPC; however, the results were inconsistent [13–15]. Therefore, we comprehensively and systematically searched for eligible studies to clarify the prognostic role of Ki-67 in patients with NPC.

\*These authors contributed equally to this work as co-first authors.

Received: 25 September 2020  
Revised: 08 November 2020  
Accepted: 16 November 2020

Version of Record published:  
06 May 2021

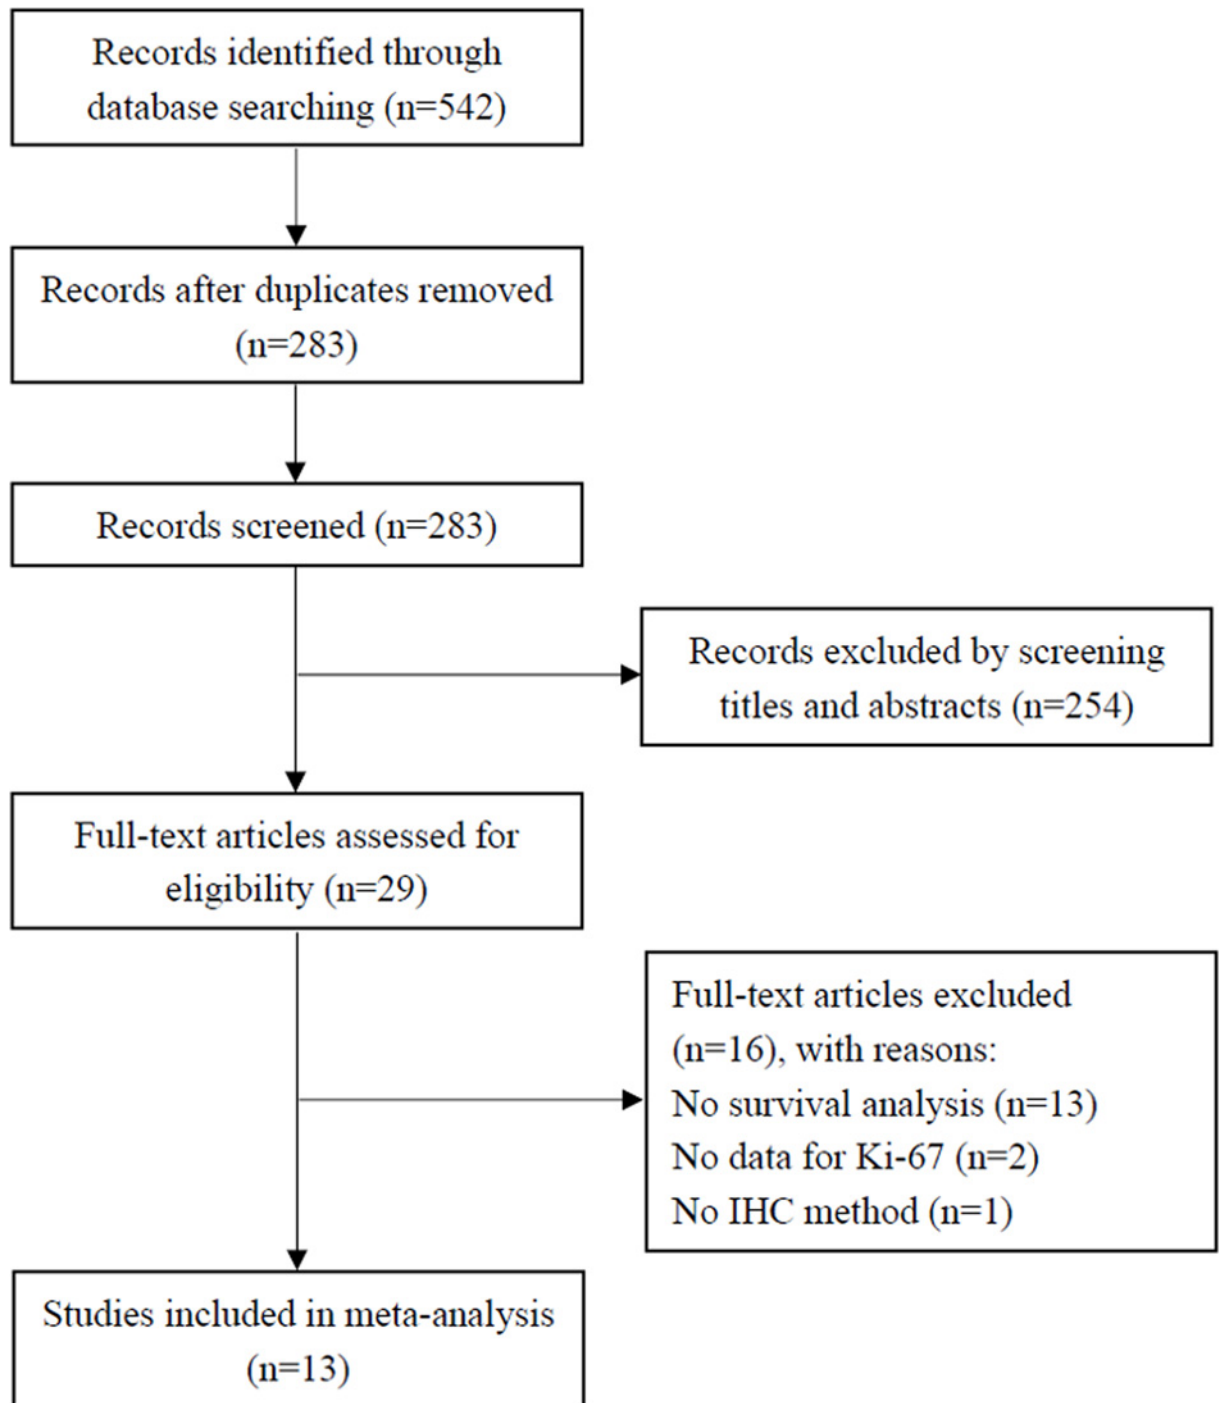

Figure 1. Flow diagram of the literature identification process

## Materials and methods

### Study guidelines and ethics

We performed the present meta-analysis in accordance with the Preferred Reporting Items for Systematic Reviews and Meta-Analyses guidelines [16]. Ethical approval was not necessary because the present study did not involve patient consent.

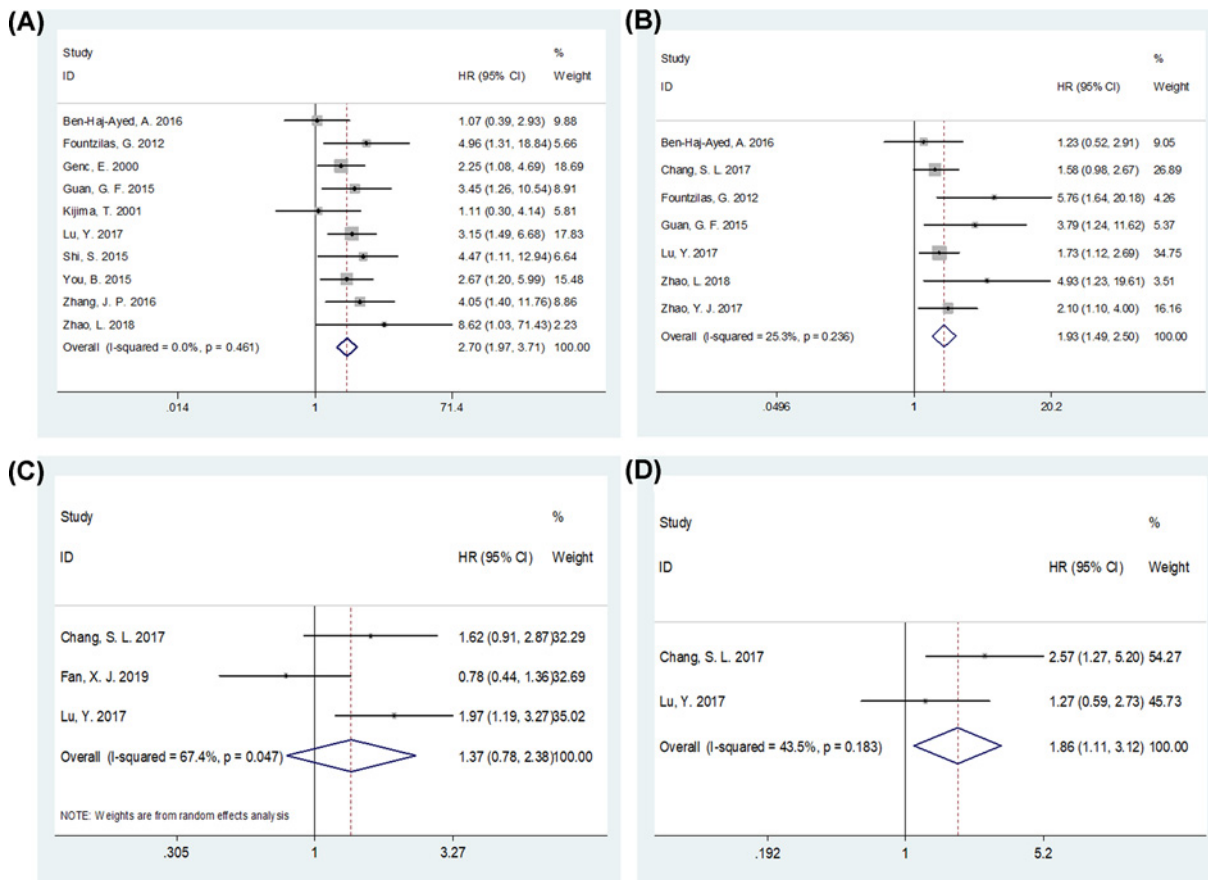

**Figure 2.** The forest plots depicting the prognostic value of Ki-67 for NPC

Forest plots for the relationship between Ki-67 expression and (A) OS, (B) DFS, (C) DMFS, and (D) LRFS in patients with NPC.

## Literature search

The literature search was conducted from the inception of the present study to 19 June 2020. We retrieved the electronic databases of PubMed, Web of Science, Embase, Scopus, and The Cochrane Library. The following search terms were used: ‘Ki-67,’ ‘Ki67,’ ‘MIB-1,’ ‘prognosis,’ ‘prognostic,’ ‘survival,’ ‘outcome,’ ‘nasopharyngeal carcinoma,’ ‘nasopharyngeal cancer,’ and ‘nasopharyngeal neoplasms.’ We manually examined the reference lists of relevant literature to identify eligible studies.

## Selection criteria

The inclusion criteria were as follows: (1) studies evaluating the association between Ki-67 expression and survival in patients with NPC; (2) Ki-67 detection in tumor tissue using immunohistochemistry (IHC); (3) hazard ratios (HRs) and 95% confidence intervals (CIs) for survival outcomes were provided in text or could be calculated; (4) a cutoff value was identified to stratify high and low Ki-67 expression; (5) published in English. Studies that did not meet all the inclusion criteria were excluded. Two reviewers (Y.I.L. and L.Y.) independently evaluated candidate studies, and all disagreements were resolved by consensus.

## Data extraction

Two investigators (Y.I.L. and L.Y.) extracted the data of the eligible studies independently with a predefined form. All discrepancies were resolved by discussion with a third investigator (X.L.). Extracted data included the name of the author, year of publication, study location, survival outcomes, TNM stage, treatment method, sample size, study design, and analysis of HR. Overall survival (OS) was the primary endpoint. Disease-free survival (DFS), distant metastasis-free survival (DMFS), and local recurrence-free survival (LRFS) were secondary endpoints.

**Table 1** Baseline characteristics of studies included in the present meta-analysis

| Study        | Year | Country/<br>region | Outcome                | TNM<br>stage | Treatment         | Sample<br>size | Cut-off value<br>for Ki-67 | Analysis<br>of HR | Study design  | Detection<br>method | NOS<br>score |
|--------------|------|--------------------|------------------------|--------------|-------------------|----------------|----------------------------|-------------------|---------------|---------------------|--------------|
| Ben-Haj-Ayed | 2016 | Tunisia            | OS, DFS                | I-IV         | Mixed             | 71             | ≥5%                        | Multivariate      | Retrospective | IHC                 | 7            |
| Chang        | 2017 | Taiwan             | DFS, DMFS,<br>LRFS     | I-IV         | Mixed             | 124            | H-score ≥<br>median        | Univariate        | Retrospective | IHC                 | 7            |
| Fan          | 2019 | China              | DMFS                   | III-IV       | Chemoradiotherapy | 147            | ≥5%                        | Univariate        | Prospective   | IHC                 | 8            |
| Fountzilias  | 2012 | Greece             | OS, DFS                | II-IV        | Chemoradiotherapy | 141            | ≥5%                        | Multivariate      | Prospective   | IHC                 | 9            |
| Genç         | 2000 | Turkey             | OS                     | I-IV         | Radiotherapy      | 35             | ≥10%                       | Univariate        | Retrospective | IHC                 | 6            |
| Guan         | 2015 | China              | OS, DFS                | I-IV         | Mixed             | 58             | ≥10%                       | Multivariate      | Retrospective | IHC                 | 7            |
| Kijima       | 2001 | Japan              | OS                     | II-IV        | Radiotherapy      | 19             | ≥50%                       | Univariate        | Retrospective | IHC                 | 6            |
| Lu           | 2017 | China              | OS, DFS,<br>DMFS, LRFS | I-IV         | Chemoradiotherapy | 334            | ≥10%                       | Univariate        | Retrospective | IHC                 | 8            |
| Shi          | 2015 | China              | OS                     | I-IV         | Chemoradiotherapy | 55             | ≥50%                       | Univariate        | Retrospective | IHC                 | 7            |
| You          | 2015 | China              | OS                     | I-IV         | Mixed             | 118            | ≥50%                       | Univariate        | Retrospective | IHC                 | 7            |
| Zhang        | 2016 | China              | OS                     | I-IV         | Chemoradiotherapy | 59             | ≥25%                       | Univariate        | Retrospective | IHC                 | 8            |
| Zhao         | 2018 | China              | OS, DFS                | I-IV         | Mixed             | 45             | ≥77.5%                     | Multivariate      | Retrospective | IHC                 | 6            |
| Zhao         | 2017 | China              | DFS                    | III-IV       | Mixed             | 108            | ≥10%                       | Multivariate      | Retrospective | IHC                 | 8            |

## Quality assessment

The Newcastle–Ottawa Scale (NOS) [17] was employed to assess the quality of the methodology used in the included studies. It contains three domains: selection of patients (0–4 points), comparability of cohorts (0–2 points), and outcome assessment (0–3 points). NOS scores of at least 6 were considered high quality.

## Statistical analysis

The association between Ki-67 and OS, DFS, DMFS, and LRFS was evaluated by combining HRs and 95% CIs of included studies. HR > 1 without a 95% CI overlapping 1 indicated that overexpression of Ki-67 was the prognostic risk factor, and HR < 1 without a 95% CI overlapping 1 was a protective factor. Statistical heterogeneity was calculated according to Higgins  $I^2$  statistic and Cochran's Q test. The  $I^2$  values > 50% or  $P$  of heterogeneity < 0.1 were considered significant heterogeneity, and consequently the random-effects model was adopted; if not, the fixed-effects model was selected. We performed subgroup analyses stratified by clinical variables including geographical region, TNM stage, treatment, sample size, cutoff value, analysis of HR, and study design for OS and DFS. Publication bias was detected using Begg's rank correlation test and Egger's linear regression test. Stata statistical software (version 12.0; Stata Corp, College Station, TX, U.S.A.) was used to analyze the extracted data. A  $P$ -value < 0.05 was considered significant.

## Results

### Study search

Initially, 542 studies were retrieved from the databases, and 283 studies remained after duplicates were removed. By examining titles and abstracts, 254 studies were discarded, leaving 29 studies for full-text evaluation. Sixteen studies were excluded for the following reasons: no survival analysis ( $n=13$ ), no data for Ki-67 ( $n=2$ ), and no IHC method ( $n=1$ ). Finally, 13 studies that met the inclusion criteria were included in the present meta-analysis [13–15,18–27] (Figure 1).

### Characteristics of included studies

The included studies were published between 2000 and 2019 (Table 1). The studies were conducted in six countries/regions, including China ( $n=8$ ) [19,14,22–27], Tunisia ( $n=1$ ) [13], Taiwan ( $n=1$ ) [18], Greece ( $n=1$ ) [20], Turkey ( $n=1$ ) [21], and Japan ( $n=1$ ) [15]. Two studies [19,20] were prospective trials, and eleven studies [13–15,18,21–27] had a retrospective study design. Nine studies [13,14,18,21–26] recruited patients with TNM stages I–IV, two studies [19,27] with TNM stages III–IV, and two studies [20,15] with TNM stages II–IV. A total of 1314 patients were included in the meta-analysis. Five studies provided multivariate HRs [13,14,20,26,27], and eight studies presented univariate HRs [15,18,19,21–25]. The cutoff values of Ki-67 were not uniform between eligible studies: ≥10% ( $n=4$ ) [14,21,22,27], ≥5% ( $n=3$ ) [13,19,20], ≥50% ( $n=3$ ) [15,23,24], ≥25% ( $n=1$ ) [25], ≥77.5% ( $n=1$ ) [26],

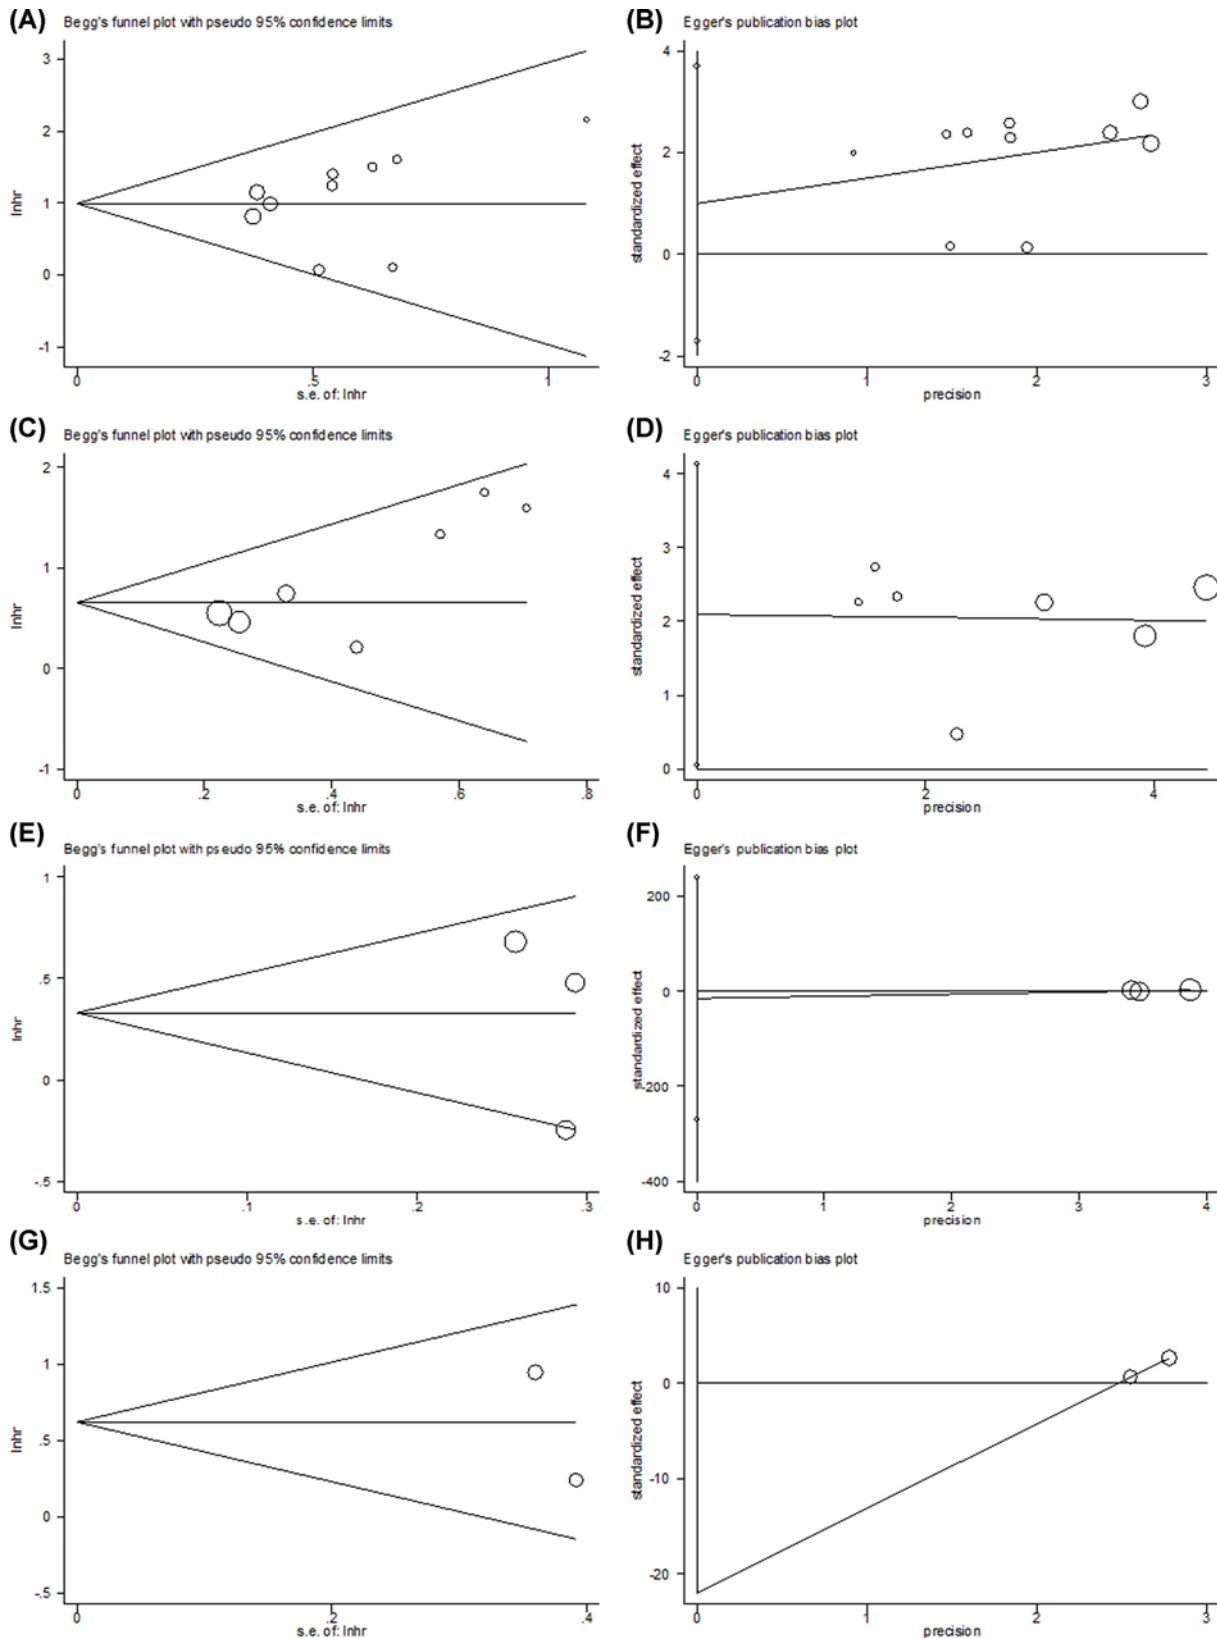

**Figure 3. Publication bias test through Begg's funnel plot and Egger's regression test in this meta-analysis**

(A) Begg's test for OS,  $P=0.072$ . (B) Egger's test for OS,  $P=0.419$ . (C) Begg's test for DFS,  $P=0.133$ . (D) Egger's test for DFS,  $P=0.086$ . (E) Begg's test for DMFS,  $P=0.602$ . (F) Egger's test for DMFS,  $P=0.591$ . (G) Begg's test for LRFS,  $P=0.317$ . (H) Egger's test for LRFS,  $P=1$ .

**Table 2** Details of NOS scores for studies included in this meta-analysis

| Study        | Year | Selection                                |                                     |                           | Comparability                                                            |                                                                 | Outcome               |                                             | NOS score |                                  |
|--------------|------|------------------------------------------|-------------------------------------|---------------------------|--------------------------------------------------------------------------|-----------------------------------------------------------------|-----------------------|---------------------------------------------|-----------|----------------------------------|
|              |      | Representativeness of the exposed cohort | Selection of the non-exposed cohort | Ascertainment of exposure | Demonstration that outcome of interest was not present at start of study | Comparability of cohorts on the basis of the design or analysis | Assessment of outcome | Follow-up long enough for outcomes to occur |           | Adequacy of follow-up of cohorts |
| Ben-Haj-Ayed | 2016 | ★                                        | ★                                   | ★                         | ★                                                                        | ★                                                               | ★                     | -                                           | ★         | 7                                |
| Chang        | 2017 | ★                                        | ★                                   | ★                         | ★                                                                        | ★                                                               | ★                     | ★                                           | -         | 7                                |
| Fan          | 2019 | ★                                        | ★                                   | ★                         | ★                                                                        | ★★                                                              | ★                     | ★                                           | -         | 8                                |
| Fountzilias  | 2012 | ★                                        | ★                                   | ★                         | ★                                                                        | ★★                                                              | ★                     | ★                                           | ★         | 9                                |
| Genç         | 2000 | ★                                        | ★                                   | -                         | ★                                                                        | ★                                                               | ★                     | ★                                           | -         | 6                                |
| Guan         | 2015 | ★                                        | ★                                   | ★                         | ★                                                                        | ★                                                               | ★                     | -                                           | ★         | 7                                |
| Kijima       | 2001 | ★                                        | ★                                   | ★                         | ★                                                                        | ★                                                               | ★                     | -                                           | -         | 6                                |
| Lu           | 2017 | ★                                        | ★                                   | ★                         | ★                                                                        | ★★                                                              | ★                     | -                                           | ★         | 8                                |
| Shi          | 2015 | ★                                        | ★                                   | ★                         | ★                                                                        | ★                                                               | ★                     | ★                                           | -         | 7                                |
| You          | 2015 | ★                                        | ★                                   | ★                         | ★                                                                        | ★                                                               | ★                     | ★                                           | -         | 7                                |
| Zhang        | 2016 | ★                                        | ★                                   | ★                         | ★                                                                        | ★★                                                              | ★                     | ★                                           | -         | 8                                |
| Zhao         | 2018 | ★                                        | ★                                   | ★                         | -                                                                        | ★                                                               | ★                     | ★                                           | -         | 6                                |
| Zhao         | 2017 | ★                                        | ★                                   | ★                         | ★                                                                        | ★★                                                              | ★                     | -                                           | ★         | 8                                |

and H-score  $\geq$  median ( $n=1$ ) [18]. NOS scores of included studies were no less than 6 (high quality), and details for each study are listed in Table 2.

### Prognostic value of Ki-67 for survival outcomes

The prognostic value of Ki-67 for various survival outcomes, including OS, DFS, DMFS, and LRFS, were analyzed. Ten studies with 935 patients [13–15,20–26] provided HRs and 95% CIs for OS (Figure 2A and Table 3). The pooled results were HR = 2.70, 95% CI = 1.97–3.71, and  $P < 0.001$ , suggesting that Ki-67 overexpression was associated with poorer OS in NPC. Data from seven studies with 881 patients [13,14,18,20,22,26,27] were aggregated, and the results were HR = 1.93, 95% CI = 1.49–2.50, and  $P < 0.001$ , which demonstrated the significant prognostic role of Ki-67 in DFS (Figure 2B and Table 2). The correlation between Ki-67 and poor LRFS was also significant ( $n=2$ , HR = 1.86, 95% CI = 1.11–3.12,  $P=0.019$ ; Figure 2D and Table 3). However, there was no significant association between Ki-67 and DMFS ( $n=3$ , HR = 1.37, 95% CI = 0.78–2.38,  $P=0.270$ ; Figure 2C and Table 3).

### Subgroup analysis

Subgroup analysis for OS and DFS was carried out to investigate the source of heterogeneity. We used seven variables for subgroup analysis, including geographical region, TNM stage, treatment, sample size, cutoff value, analysis of HR, and study design. High Ki-67 expression remained a significant prognostic factor for OS irrespective of treatment, sample size, analysis of HR, and study design (Table 3; all  $P < 0.05$ ). In addition, Ki-67 overexpression was associated with poor OS in Asian patients ( $P < 0.001$ ), in patients with TNM stage I–IV ( $P < 0.001$ ), and with cutoff values  $\geq 10\%$  ( $P < 0.001$ ) and  $\geq 50\%$  ( $P=0.003$ ) (Table 3). Elevated Ki-67 expression was predictive of poor DFS in all subgroups of TNM stage, sample size, analysis of HR, and study design (Table 3; all  $P < 0.05$ ). Moreover, high Ki-67 expression was correlated with poor DFS in Asian patients ( $P < 0.001$ ), in patients receiving mixed treatments ( $P < 0.001$ ), and with a Ki-67 cutoff value of  $\geq 10\%$  ( $P < 0.001$ ) (Table 3).

### Publication bias

The funnel plots of Begg's test and Egger's regression test for the meta-analysis are shown in Figure 3. The funnel plots were visually symmetrical, and Egger's test suggested non-significant publication bias in this meta-analysis.

**Table 3 Summary of the subgroup analysis**

| Subgroups           | Studies (n) | Patients (n) | Effects model | HR (95% CI)       | P      | Heterogeneity      |       |
|---------------------|-------------|--------------|---------------|-------------------|--------|--------------------|-------|
|                     |             |              |               |                   |        | I <sup>2</sup> (%) | P     |
| <b>OS</b>           |             |              |               |                   |        |                    |       |
| Total               | 10          | 935          | FEM           | 2.70 (1.97–3.71)  | <0.001 | 0                  | 0.461 |
| Geographical region |             |              |               |                   |        |                    |       |
| Asia                | 8           | 723          | FEM           | 2.89 (2.05–4.08)  | <0.001 | 0                  | 0.713 |
| Non-Asia            | 2           | 212          | REM           | 2.16 (0.48–9.66)  | 0.314  | 69.1               | 0.072 |
| TNM stage           |             |              |               |                   |        |                    |       |
| I–IV                | 8           | 775          | FEM           | 2.76 (1.97–3.86)  | <0.001 | 0                  | 0.518 |
| II–IV               | 2           | 160          | REM           | 2.34 (0.54–10.13) | 0.256  | 59.2               | 0.117 |
| Treatment           |             |              |               |                   |        |                    |       |
| Radiotherapy        | 2           | 54           | FEM           | 1.90 (1.00–3.61)  | 0.049  | 0                  | 0.358 |
| Chemoradiotherapy   | 4           | 589          | FEM           | 3.79 (2.28–6.29)  | <0.001 | 0                  | 0.925 |
| Mixed               | 4           | 292          | FEM           | 2.39 (1.41–4.03)  | 0.001  | 31.5               | 0.223 |
| Sample size         |             |              |               |                   |        |                    |       |
| <100                | 7           | 342          | FEM           | 2.45 (1.63–3.67)  | <0.001 | 20.7               | 0.272 |
| ≥100                | 3           | 593          | FEM           | 3.16 (1.90–5.24)  | <0.001 | 0                  | 0.739 |
| Cutoff value        |             |              |               |                   |        |                    |       |
| ≥5%                 | 2           | 212          | REM           | 2.16 (0.48–9.66)  | 0.314  | 69.1               | 0.072 |
| ≥10%                | 3           | 427          | FEM           | 2.79 (1.75–4.47)  | <0.001 | 0                  | 0.747 |
| ≥50%                | 3           | 192          | FEM           | 2.52 (1.38–4.59)  | 0.003  | 14.8               | 0.309 |
| Others              | 2           | 104          | FEM           | 4.72 (1.82–12.23) | 0.001  | 0                  | 0.533 |
| Analysis of HR      |             |              |               |                   |        |                    |       |
| Univariate          | 6           | 620          | FEM           | 2.74 (1.89–3.97)  | <0.001 | 0                  | 0.646 |
| Multivariate        | 4           | 315          | FEM           | 2.61 (1.41–4.82)  | 0.002  | 44.2               | 0.146 |
| Study design        |             |              |               |                   |        |                    |       |
| Retrospective       | 9           | 794          | FEM           | 2.61 (1.88–3.61)  | <0.001 | 0                  | 0.443 |
| Prospective         | 1           | 141          | -             | 4.96 (1.31–18.81) | 0.019  | -                  | -     |
| <b>DFS</b>          |             |              |               |                   |        |                    |       |
| Total               | 7           | 881          | FEM           | 1.93 (1.49–2.50)  | <0.001 | 25.3               | 0.236 |
| Geographical region |             |              |               |                   |        |                    |       |
| Asia                | 5           | 669          | FEM           | 1.91 (1.45–2.53)  | <0.001 | 1.5                | 0.398 |
| Non-Asia            | 2           | 212          | REM           | 2.48 (0.55–11.19) | 0.237  | 74.7               | 0.047 |
| TNM stage           |             |              |               |                   |        |                    |       |
| I–IV                | 5           | 632          | FEM           | 1.78 (1.33–2.39)  | <0.001 | 16.2               | 0.312 |
| II–IV/III–IV        | 2           | 249          | FEM           | 2.59 (1.46–4.60)  | 0.001  | 49.2               | 0.161 |
| Treatment           |             |              |               |                   |        |                    |       |
| Chemoradiotherapy   | 2           | 475          | REM           | 2.72 (0.87–8.50)  | 0.085  | 68.1               | 0.077 |
| Mixed               | 5           | 406          | FEM           | 1.89 (1.36–2.64)  | <0.001 | 17.9               | 0.300 |
| Sample size         |             |              |               |                   |        |                    |       |
| <100                | 3           | 174          | FEM           | 2.26 (1.23–4.17)  | 0.009  | 49.5               | 0.138 |
| ≥100                | 4           | 707          | FEM           | 1.86 (1.40–2.47)  | <0.001 | 20.0               | 0.290 |
| Cutoff value        |             |              |               |                   |        |                    |       |
| ≥5%                 | 2           | 212          | REM           | 2.48 (0.55–11.19) | 0.237  | 74.7               | 0.047 |
| ≥10%                | 3           | 500          | FEM           | 1.97 (1.40–2.79)  | <0.001 | 0                  | 0.433 |
| Others              | 2           | 169          | REM           | 2.31 (0.81–6.58)  | 0.118  | 56.4               | 0.130 |
| Analysis of HR      |             |              |               |                   |        |                    |       |
| Univariate          | 2           | 458          | FEM           | 1.67 (1.20–2.32)  | 0.002  | 0                  | 0.787 |
| Multivariate        | 5           | 423          | FEM           | 2.43 (1.60–3.69)  | <0.001 | 33.6               | 0.197 |
| Study design        |             |              |               |                   |        |                    |       |
| Retrospective       | 6           | 740          | FEM           | 1.83 (1.41–2.39)  | <0.001 | 0                  | 0.419 |
| Prospective         | 1           | 141          | -             | 5.76 (1.64–20.21) | 0.006  | -                  | -     |
| <b>DMFS</b>         |             |              |               |                   |        |                    |       |
| Total               | 3           | 605          | REM           | 1.37 (0.78–2.38)  | 0.270  | 67.4               | 0.047 |
| <b>LRFS</b>         |             |              |               |                   |        |                    |       |
| Total               | 2           | 458          | FEM           | 1.86 (1.11–3.12)  | 0.019  | 43.5               | 0.183 |

Downloaded from <http://port.silverchair.com/biosciencearticle-pdf/41/5/BSR20203334/910698/bsr-2020-3334.pdf> by guest on 23 April 2024

## Discussion

To our knowledge, the present study is the first meta-analysis exploring the prognostic value of Ki-67 in patients with NPC. The prognostic effect of Ki-67 in patients with NPC is controversial based on the results of relevant studies [13–15,18–27]. The current meta-analysis incorporated data from 13 studies comprising 1314 patients and demonstrated that elevated Ki-67 expression was associated with long-term (OS and DFS) and short-term (LRFS) survival outcomes in patients with NPC. Furthermore, the prognostic role of Ki-67 was maintained throughout different sample sizes, analyses of HR, and study designs for OS and DFS in various subgroups. Ki-67 exerts significant prognostic value for Asian patients, and a Ki-67 cutoff value  $\geq 10\%$  showed consistent prognostic efficiency. According to these results, Ki-67 could be used as a reliable prognostic indicator for NPC, particularly in patients of Asian ethnicity.

Ki-67 is a nuclear protein expressed throughout the cell cycle in proliferating cells that has been investigated as a prognostic marker in various cancers [28,8,12]. The current meta-analysis demonstrated the prognostic role of Ki-67 expression in patients with NPC. Notably, a recent meta-analysis explored the prognostic value of hematological parameters in patients with NPC, which included 23 studies comprising 23417 patients and found neutrophil-to-lymphocyte ratio, C-reactive protein-to-albumin ratio, lymphocyte-to-monocyte ratio, plasma fibrinogen level, and Glasgow prognostic score (GPS) to have an impact on prognostication in NPC [29]. That meta-analysis [29] included 23 studies encompassing 23417 patients and demonstrated a series of hematological indexes, including neutrophil-to-lymphocyte ratio, C-reactive protein-to-albumin ratio, lymphocyte-to-monocyte ratio, plasma fibrinogen level, and GPS have impact on prognostication in NPC. Serum-based parameters are easily accessible and cost-effective in clinical practice. Compared with hematological indexes, Ki-67 has several advantages. First, Ki-67 is stable and cannot be significantly affected by the immunological status of patients; whereas Ki-67 is measured using IHC in tumor tissue, hematological markers are derived from blood-based indexes that can be influenced by chronic inflammation and nutritional condition, not just by cancer. Second, Ki-67 protein, a tumor proliferation marker, is comparable in other types of cancers such as head and neck [30], colorectal [31], and non-small cell lung cancer [12].

The cutoff values of Ki-67 to stratify high and low expression were not consistent in previous studies. In the current meta-analysis, a Ki-67 cutoff value  $\geq 10\%$  showed a consistent prognostic effect. In a recent study on colorectal cancer, a cutoff value of 25% for Ki-67 expression was a good classification tool in the AJCC-8 (American Joint Committee on Cancer 8 edition) stratification [31]. Another study indicated that a Ki-67 index of 5% is better than 2% in stratifying G1 and G2 pancreatic neuroendocrine tumors [32]. These studies suggest that the optimal cutoff value of Ki-67 may vary among different solid tumors. As suggested by our meta-analysis, a cutoff of 10% for Ki-67 expression should be validated for NPC in clinical practice.

The limitations of our meta-analysis need to be acknowledged. First, most of the included studies were retrospective, and heterogeneity may have been introduced. Second, some HRs and 95% CIs extracted using the Kaplan–Meier curves were not directly reported in text; therefore, data calculated may not be accurate. Third, the sample sizes for DMFS/LRFS were relatively small, which may compromise the validity of the prognostic significance of Ki-67 for DMFS and LRFS.

## Conclusions

In summary, elevated Ki-67 expression is a reliable prognostic factor for poorer survival outcomes in NPC. The prognostic effect of Ki-67 remains stable across different subgroups of patients. Therefore, the Ki-67 index may be an important supplementary tool for the prognosis of patients with NPC.

### Data Availability

All data associated with the present study are included in this published article or are available from the corresponding author on reasonable request.

### Competing Interests

The authors declare that there are no competing interests associated with the manuscript.

### Funding

This work was supported by the Foundation of Health Commission of Sichuan Province [grant number 19PJ033].

### Author Contribution

Y.I.L. and L.Y. collected the studies and analyzed the data. Y.q.L. and Q.Z. wrote the script. X.L. revised the final paper. All authors read and approved the final manuscript.



## Abbreviations

CI, confidence interval; DFS, disease-free survival; DMFS, distant metastasis-free survival; HR, hazard ratio; IHC, immunohistochemistry; LRFS, local recurrence-free survival; NOS, Newcastle–Ottawa Scale; NPC, nasopharyngeal carcinoma; OS, overall survival; TNM, tumor-node-metastasis.

## References

- 1 Sun, X.S., Li, X.Y., Chen, Q.Y., Tang, L.Q. and Mai, H.Q. (2019) Future of radiotherapy in nasopharyngeal carcinoma. *Br. J. Radiol.* **92**, 20190209, <https://doi.org/10.1259/bjr.20190209>
- 2 Perri, F., Scarpato, G.D., Caponigro, F., Ionna, F., Longo, F., Buonopane, S. et al. (2019) Management of recurrent nasopharyngeal carcinoma: current perspectives. *Onco Targets Ther.* **12**, 1583–1591, <https://doi.org/10.2147/OTT.S188148>
- 3 Chen, Y.P., Chan, A.T.C., Le, Q.T., Blanchard, P., Sun, Y. and Ma, J. (2019) Nasopharyngeal carcinoma. *Lancet* **394**, 64–80, [https://doi.org/10.1016/S0140-6736\(19\)30956-0](https://doi.org/10.1016/S0140-6736(19)30956-0)
- 4 Ng, W.T., Corry, J., Langendijk, J.A., Lee, A.W.M., Makitie, A., Mendenhall, W.M. et al. (2020) Current management of stage IV nasopharyngeal carcinoma without distant metastasis. *Cancer Treat. Rev.* **85**, 101995, <https://doi.org/10.1016/j.ctrv.2020.101995>
- 5 Yang, H., Wang, K., Liang, Z., Guo, S., Zhang, P., Xu, Y. et al. (2020) Prognostic role of pre-treatment serum albumin in patients with nasopharyngeal carcinoma: a meta-analysis and systematic review. *Clin. Otolaryngol.* **45**, 167–176, <https://doi.org/10.1111/coa.13454>
- 6 Hanahan, D. and Weinberg, R.A. (2011) Hallmarks of cancer: the next generation. *Cell* **144**, 646–674, <https://doi.org/10.1016/j.cell.2011.02.013>
- 7 Avdalyan, A.M., Ivanov, A.A., Lushnikova, E.L., Molodykh, O.P. and Vikhlyanov, I.V. (2020) The relationship of immunoeexpression of Ki-67 and Hsp70 with clinical and morphological parameters and prognosis of papillary thyroid cancer. *Bull. Exp. Biol. Med.* **168**, 688–693, <https://doi.org/10.1007/s10517-020-04781-1>
- 8 Stec, R., Cierniak, S., Lubas, A., Brzóskowska, U., Syrylo, T., Zielinski, H. et al. (2020) Intensity of nuclear staining for Ki-67, p53 and survivin as a new prognostic factor in non-muscle invasive bladder cancer. *Pathol. Oncol. Res.* **26**, 1211–1219, <https://doi.org/10.1007/s12253-019-00678-1>
- 9 Grabowski, J.P., Vila, C.M., Richter, R., Taube, E., Plett, H., Braicu, E. et al. (2020) Ki67 expression as a predictor of chemotherapy outcome in low-grade serous ovarian cancer. *Int. J. Gynecol. Cancer* **30**, 498–503, <https://doi.org/10.1136/ijgc-2019-000976>
- 10 Seo, S.H., Kim, K.H., Oh, S.H., Choi, Y., Ahn, K.J., Lee, J.Y. et al. (2019) Ki-67 labeling index as a prognostic marker in advanced stomach cancer. *Ann. Surg. Treat. Res.* **96**, 27–33, <https://doi.org/10.4174/astr.2019.96.1.27>
- 11 Kanyılmaz, G., Yavuz, B.B., Aktan, M., Karağaç, M., Uyar, M. and Fndk, S. (2019) Prognostic importance of Ki-67 in breast cancer and its relationship with other prognostic factors. *Eur. J. Breast Health* **15**, 256–261, <https://doi.org/10.5152/ejbh.2019.4778>
- 12 Wang, D.M., Chen, D.M., Zhang, C., Chai, M., Guan, M.J., Wang, Z.Y. et al. (2020) Analysis of the relationship between Ki-67 expression and chemotherapy and prognosis in advanced non-small cell lung cancer. *Transl. Cancer Res.* **9**, 3491–3498, <https://doi.org/10.21037/tcr.2020.03.72>
- 13 Ben-Haj-Ayed, A., Moussa, A., Ghedira, R., Gabbouj, S., Miled, S., Bouzid, N. et al. (2016) Prognostic value of indoleamine 2,3-dioxygenase activity and expression in nasopharyngeal carcinoma. *Immunol. Lett.* **169**, 23–32, <https://doi.org/10.1016/j.imlet.2015.11.012>
- 14 Guan, G.F., Zhang, D.J., Wen, L.J., Yu, D.J., Zhao, Y., Zhu, L. et al. (2015) Prognostic value of TROP2 in human nasopharyngeal carcinoma. *Int. J. Clin. Exp. Pathol.* **8**, 10995–11004
- 15 Kijima, T., Kinukawa, N., Gooding, W.E. and Uno, M. (2001) Association of Epstein-Barr virus with tumor cell proliferation: clinical implication in nasopharyngeal carcinoma. *Int. J. Oncol.* **18**, 479–485, <https://doi.org/10.3892/ijo.18.3.479>
- 16 Moher, D., Liberati, A., Tetzlaff, J., Altman, D.G. and Grp, P. (2009) Preferred Reporting Items for Systematic Reviews and Meta-Analyses: The PRISMA statement. *PLoS Med.* **6**, e1000097, <https://doi.org/10.1371/journal.pmed.1000097>
- 17 Wells, G.A., Shea, B., O'Connell, D., Peterson, J., Welch, V., Losos, M. et al. (2009) The Newcastle–Ottawa Scale (NOS) for assessing the quality of nonrandomised studies in meta-analyses. [http://www.ohrica/programs/clinical\\_epidemiology/oxfordasp](http://www.ohrica/programs/clinical_epidemiology/oxfordasp)
- 18 Chang, S.L., Chan, T.C., Chen, T.J., Lee, S.W., Lin, L.C. and Win, K.T. (2017) HOXC6 overexpression is associated with Ki-67 expression and poor survival in NPC patients. *J. Cancer* **8**, 1647–1654, <https://doi.org/10.7150/jca.18893>
- 19 Fan, X.J., Xie, Y., Chen, H.Y., Guo, X.B., Ma, Y., Pang, X.L. et al. (2019) Distant metastasis risk definition by tumor biomarkers integrated nomogram approach for locally advanced nasopharyngeal carcinoma. *Cancer Control* **26**, <https://doi.org/10.1177/1073274819883895>
- 20 Fountzilas, G., Ciuleanu, E., Bobos, M., Kalogera-Fountzila, A., Eleftheraki, A.G., Karayannopoulou, G. et al. (2012) Induction chemotherapy followed by concomitant radiotherapy and weekly cisplatin versus the same concomitant chemoradiotherapy in patients with nasopharyngeal carcinoma: a randomized phase II study conducted by the Hellenic Cooperative Oncology Group (HeCOG) with biomarker evaluation. *Ann. Oncol.* **23**, 427–435, <https://doi.org/10.1093/annonc/mdr116>
- 21 Genç, E., Hoşal, A.S., Gedikoğlu, G., Ozyar, E. and Sözeri, B. (2000) Prognostic value of p53, proliferating cell nuclear antigen, and Ki-67 expression in undifferentiated nasopharyngeal carcinomas. *Otolaryngol. Head Neck Surg.* **122**, 868–873, [https://doi.org/10.1016/S0194-5998\(00\)70016-7](https://doi.org/10.1016/S0194-5998(00)70016-7)
- 22 Lu, Y., Huang, H.X., Kang, M., Yi, M., Yang, H., Wu, S.B. et al. (2017) Combined Ki67 and ERCC1 for prognosis in non-keratinizing nasopharyngeal carcinoma underwent chemoradiotherapy. *Oncotarget* **8**, 88552–88562, <https://doi.org/10.18632/oncotarget.19158>
- 23 Shi, S., Li, X.Y., You, B., Shan, Y., Cao, X.L. and You, Y.W. (2015) High expression of FGFR4 enhances tumor growth and metastasis in nasopharyngeal carcinoma. *J. Cancer* **6**, 1245–1254, <https://doi.org/10.7150/jca.12825>
- 24 You, B., Shan, Y., Shi, S., Li, X.Y. and You, Y.W. (2015) Effects of ADAM10 upregulation on progression, migration, and prognosis of nasopharyngeal carcinoma. *Cancer Sci.* **106**, 1506–1514, <https://doi.org/10.1111/cas.12800>
- 25 Zhang, J.P., Liu, Y.Y., Deng, Y., He, J., Lang, J.T. and Fan, J.P. (2016) Ki67 and nm23 are potential prognostic markers in patients with nasopharyngeal carcinoma. *Int. J. Clin. Exp. Pathol.* **9**, 6350–6356

- 26 Zhao, L., Chen, H., Hu, B., Zhang, H. and Lin, Q. (2018) Prognostic significance of Ki67 expression and the derived neutrophil–lymphocyte ratio in nasopharyngeal carcinoma. *Cancer Manag. Res.* **10**, 1919–1926, <https://doi.org/10.2147/CMAR.S167626>
- 27 Zhao, Y.J., Shen, L., Huang, X.Q., Jing, D., Huang, D., Fu, J. et al. (2017) High expression of Ki-67 acts a poor prognosis indicator in locally advanced nasopharyngeal carcinoma. *Biochem. Biophys. Res. Commun.* **494**, 390–396, <https://doi.org/10.1016/j.bbrc.2017.09.118>
- 28 Mukai, H., Yamaguchi, T., Takahashi, M., Hozumi, Y., Fujisawa, T., Ohsumi, S. et al. (2020) Ki-67 response-guided preoperative chemotherapy for HER2-positive breast cancer: results of a randomised Phase 2 study. *Br. J. Cancer* **122**, 1747–1753, <https://doi.org/10.1038/s41416-020-0815-9>
- 29 Yang, S., Zhao, K., Ding, X., Jiang, H. and Lu, H. (2019) Prognostic significance of hematological markers for patients with nasopharyngeal carcinoma: a meta-analysis. *J. Cancer* **10**, 2568–2577, <https://doi.org/10.7150/jca.26770>
- 30 Zuzul, I., Pavic, I., Granic, M., Kuna, T., Kotarac, A.K. and Rogulj, A.A. (2018) The significance of Ki-67 in head and neck cancers: review article. *Res. J. Pharm. Biol. Chem. Sci.* **9**, 34–38
- 31 Tong, G.J., Zhang, G.Y., Liu, J., Zheng, Z.Z., Chen, Y., Niu, P.P. et al. (2020) Cutoff of 25% for Ki67 expression is a good classification tool for prognosis in colorectal cancer in the AJCC-8 stratification. *Oncol. Rep.* **43**, 1187–1198, <https://doi.org/10.3892/or.2020.7511>
- 32 Gao, S.W., Huang, C.S., Huang, X.T., Chen, L.H., Chen, W., Cai, J.P. et al. (2019) Ki-67 index of 5% is better than 2% in Stratifying G1 and G2 of the World Health Organization Grading System in pancreatic neuroendocrine tumors. *Pancreas* **48**, 795–798, <https://doi.org/10.1097/MPA.0000000000001331>
